# Supplementary material for: Comparative evaluation of disease dynamics in wild boar and domestic pigs experimentally inoculated intranasally with the European highly virulent African swine fever virus genotype II strain “Armenia 2007”
Source: Springer Nature journal article supplement (doi:10.1186/s13567-024-01343-5), 2024-07-15

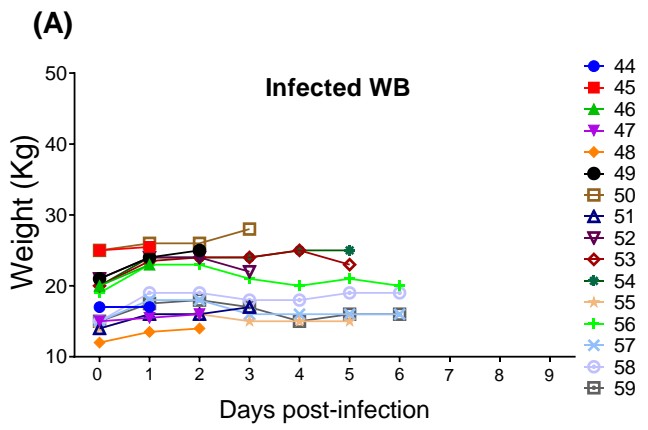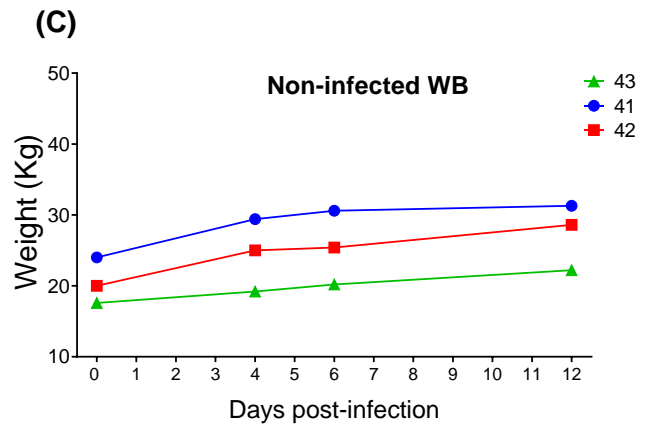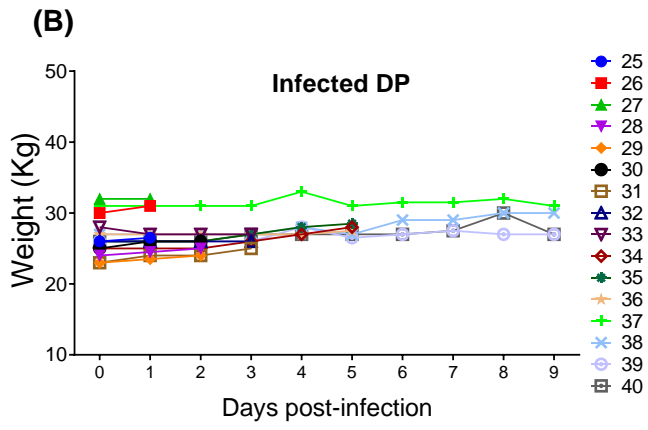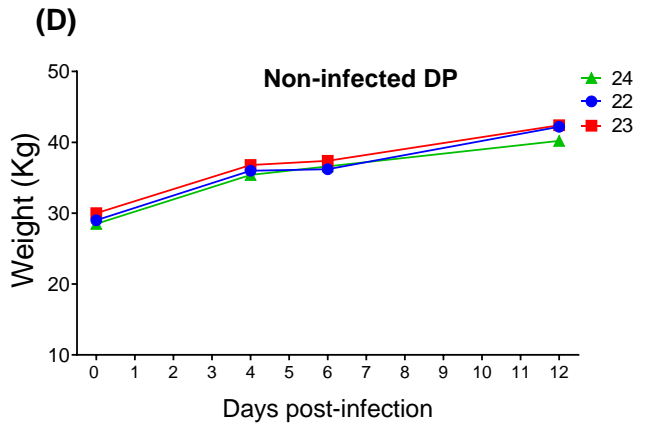

Supplement: MOESM1 [file 13567_2024_1343_MOESM1_ESM.pdf]
